# Supplementary material for: Engineering gene overlaps to sustain genetic constructs in vivo
Source: PLOS journal article supplement (doi:10.1371/journal.pcbi.1009475), 2021-10-08

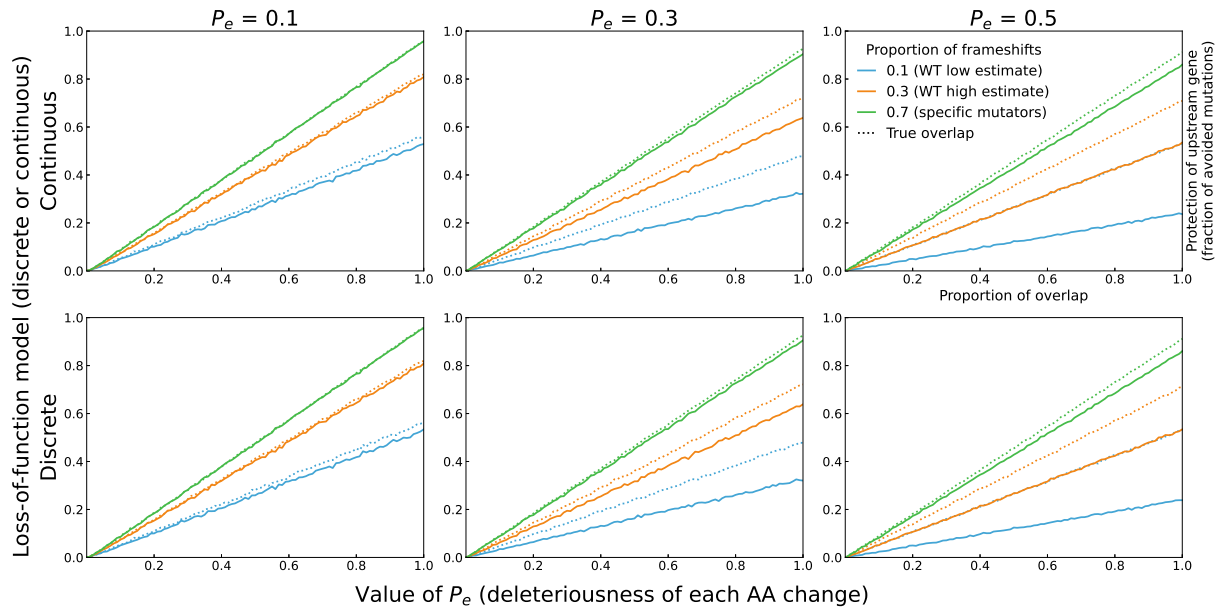

Supplement: S2 (10.1371/journal.pcbi.1009475.s002) [file journal.pcbi.1009475.s002]
