# Supplementary material for: Engineering gene overlaps to sustain genetic constructs in vivo
Source: PLOS journal article supplement (doi:10.1371/journal.pcbi.1009475), 2021-10-08
Supplement: S7 (10.1371/journal.pcbi.1009475.s007) [file journal.pcbi.1009475.s007]

| Construct          | mutational events | 95% CI lower | 95% CI upper | p-value |
|--------------------|-------------------|--------------|--------------|---------|
| MGZ1 control       | 397.255           | 354.500      | 441.700      | } 0.85  |
| MGZ1 overlap       | 357.154           | 319.100      | 396.800      |         |
| MGZ1 mutS- control | 27.347            | 20.737       | 34.611       | } 0.71  |
| MGZ1 mutS- overlap | 29.866            | 23.115       | 37.237       |         |
